# Supplementary material
Source: publisher figshare collection journal article supplement (https://tandf.figshare.com/articles/dataset/_/7423163)

# Supplementary figure 1

A

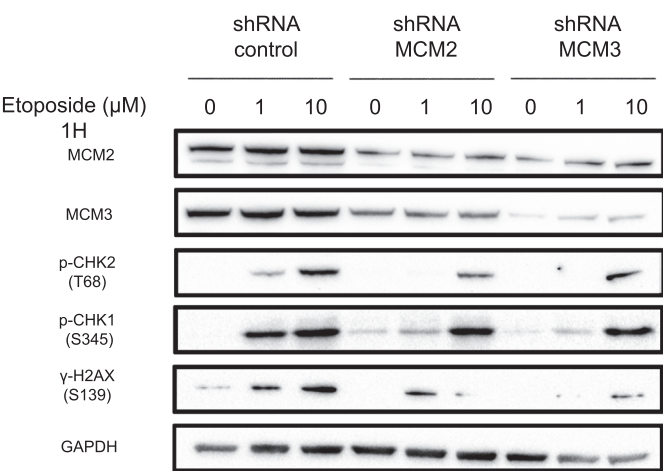

B

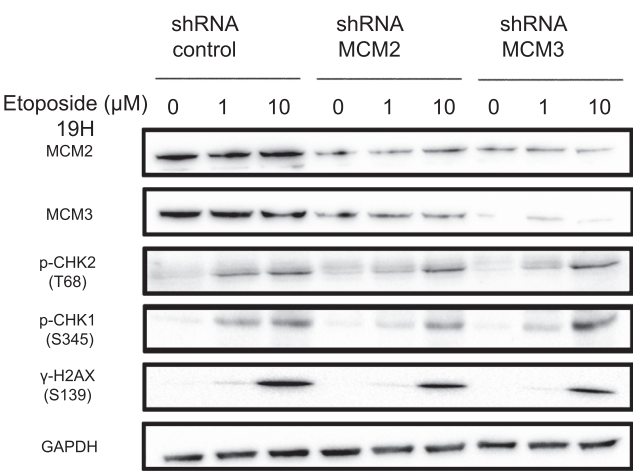

# Supplementary figure 2

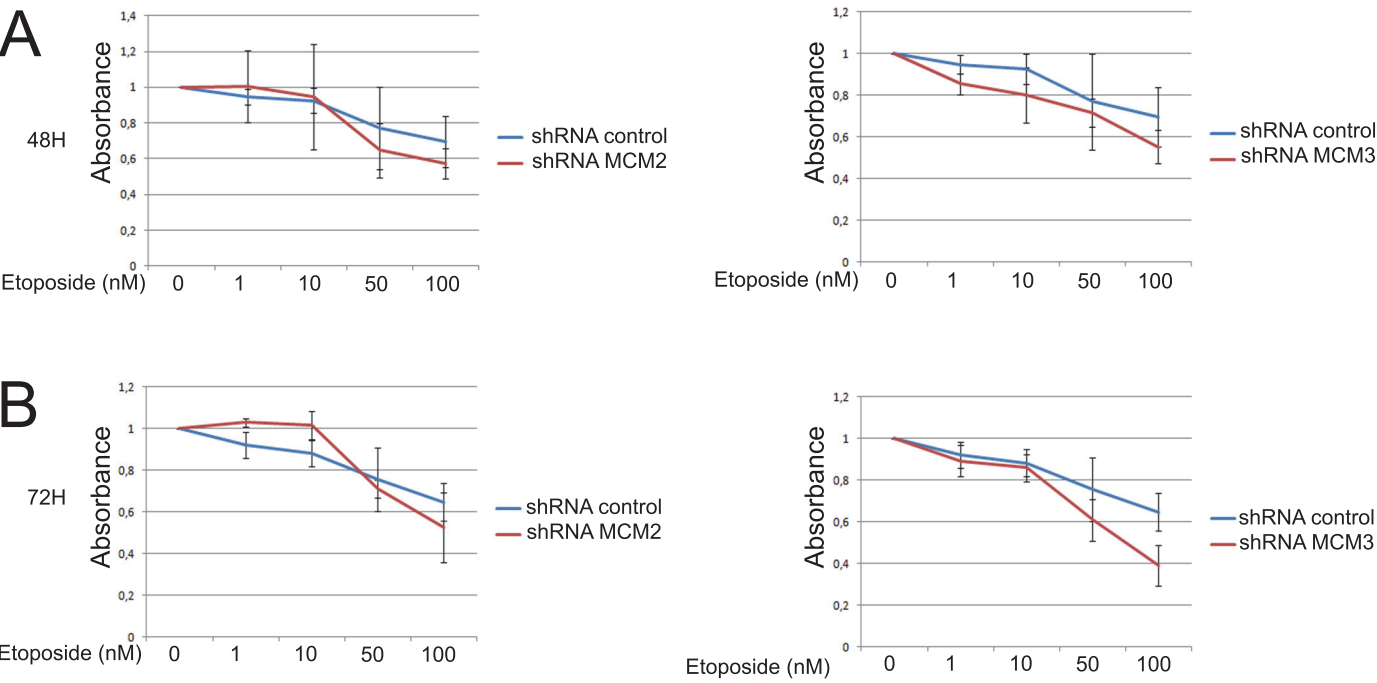

## Supplementary Figure 3

A

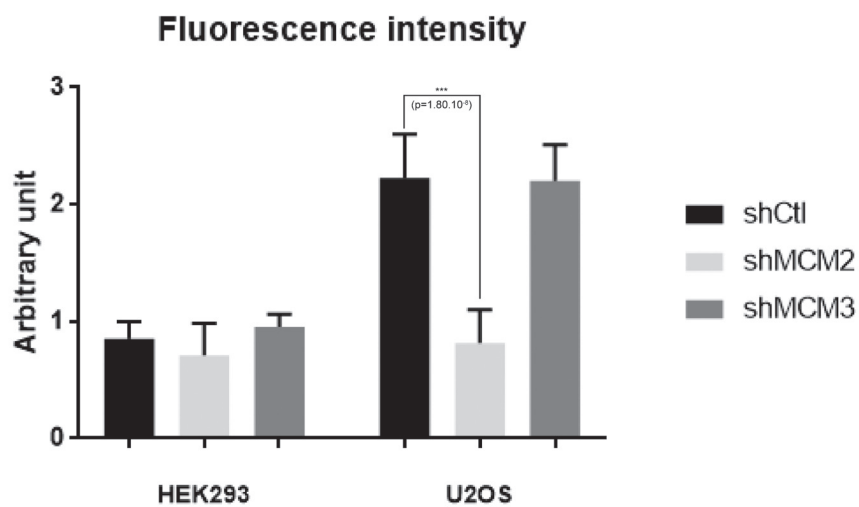

1h 10  $\mu$ M Etoposide

B

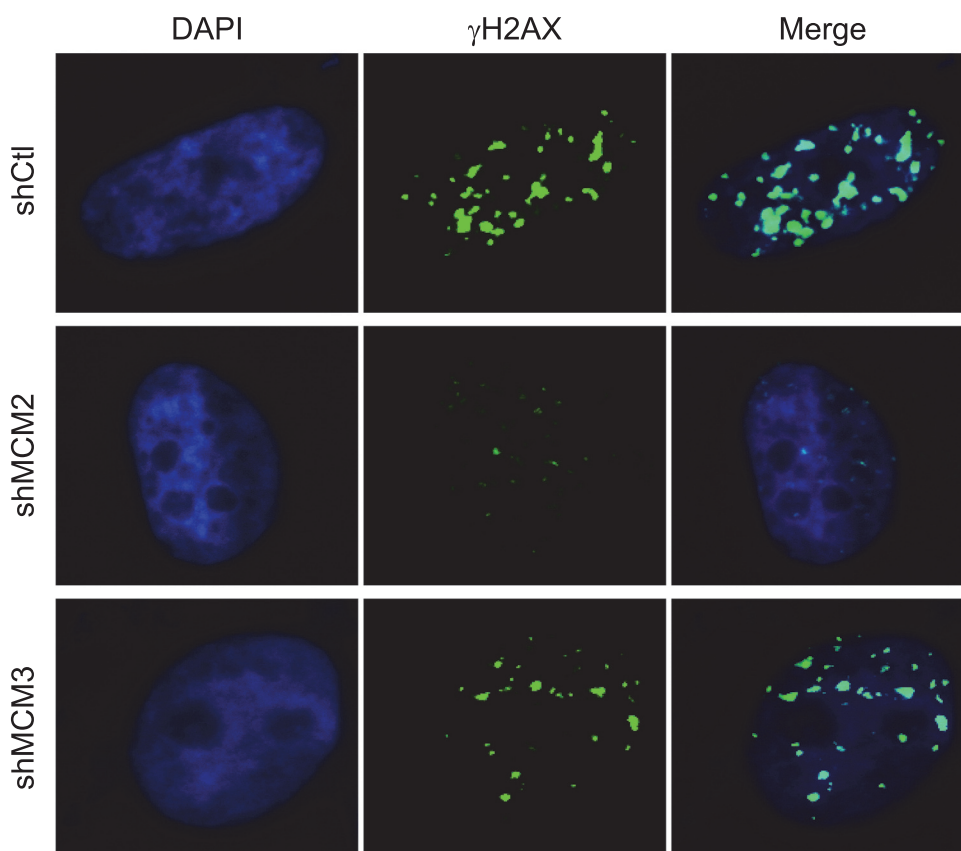

Supplement: Supplementary file 1 [file 2]
